# Supplementary material
Source: Springer Nature journal article supplement (https://www.springermedizin.de/resource/supplementary/12968_2012_3287_MOESM6_ESM.pdf/9583552)

(a) Base

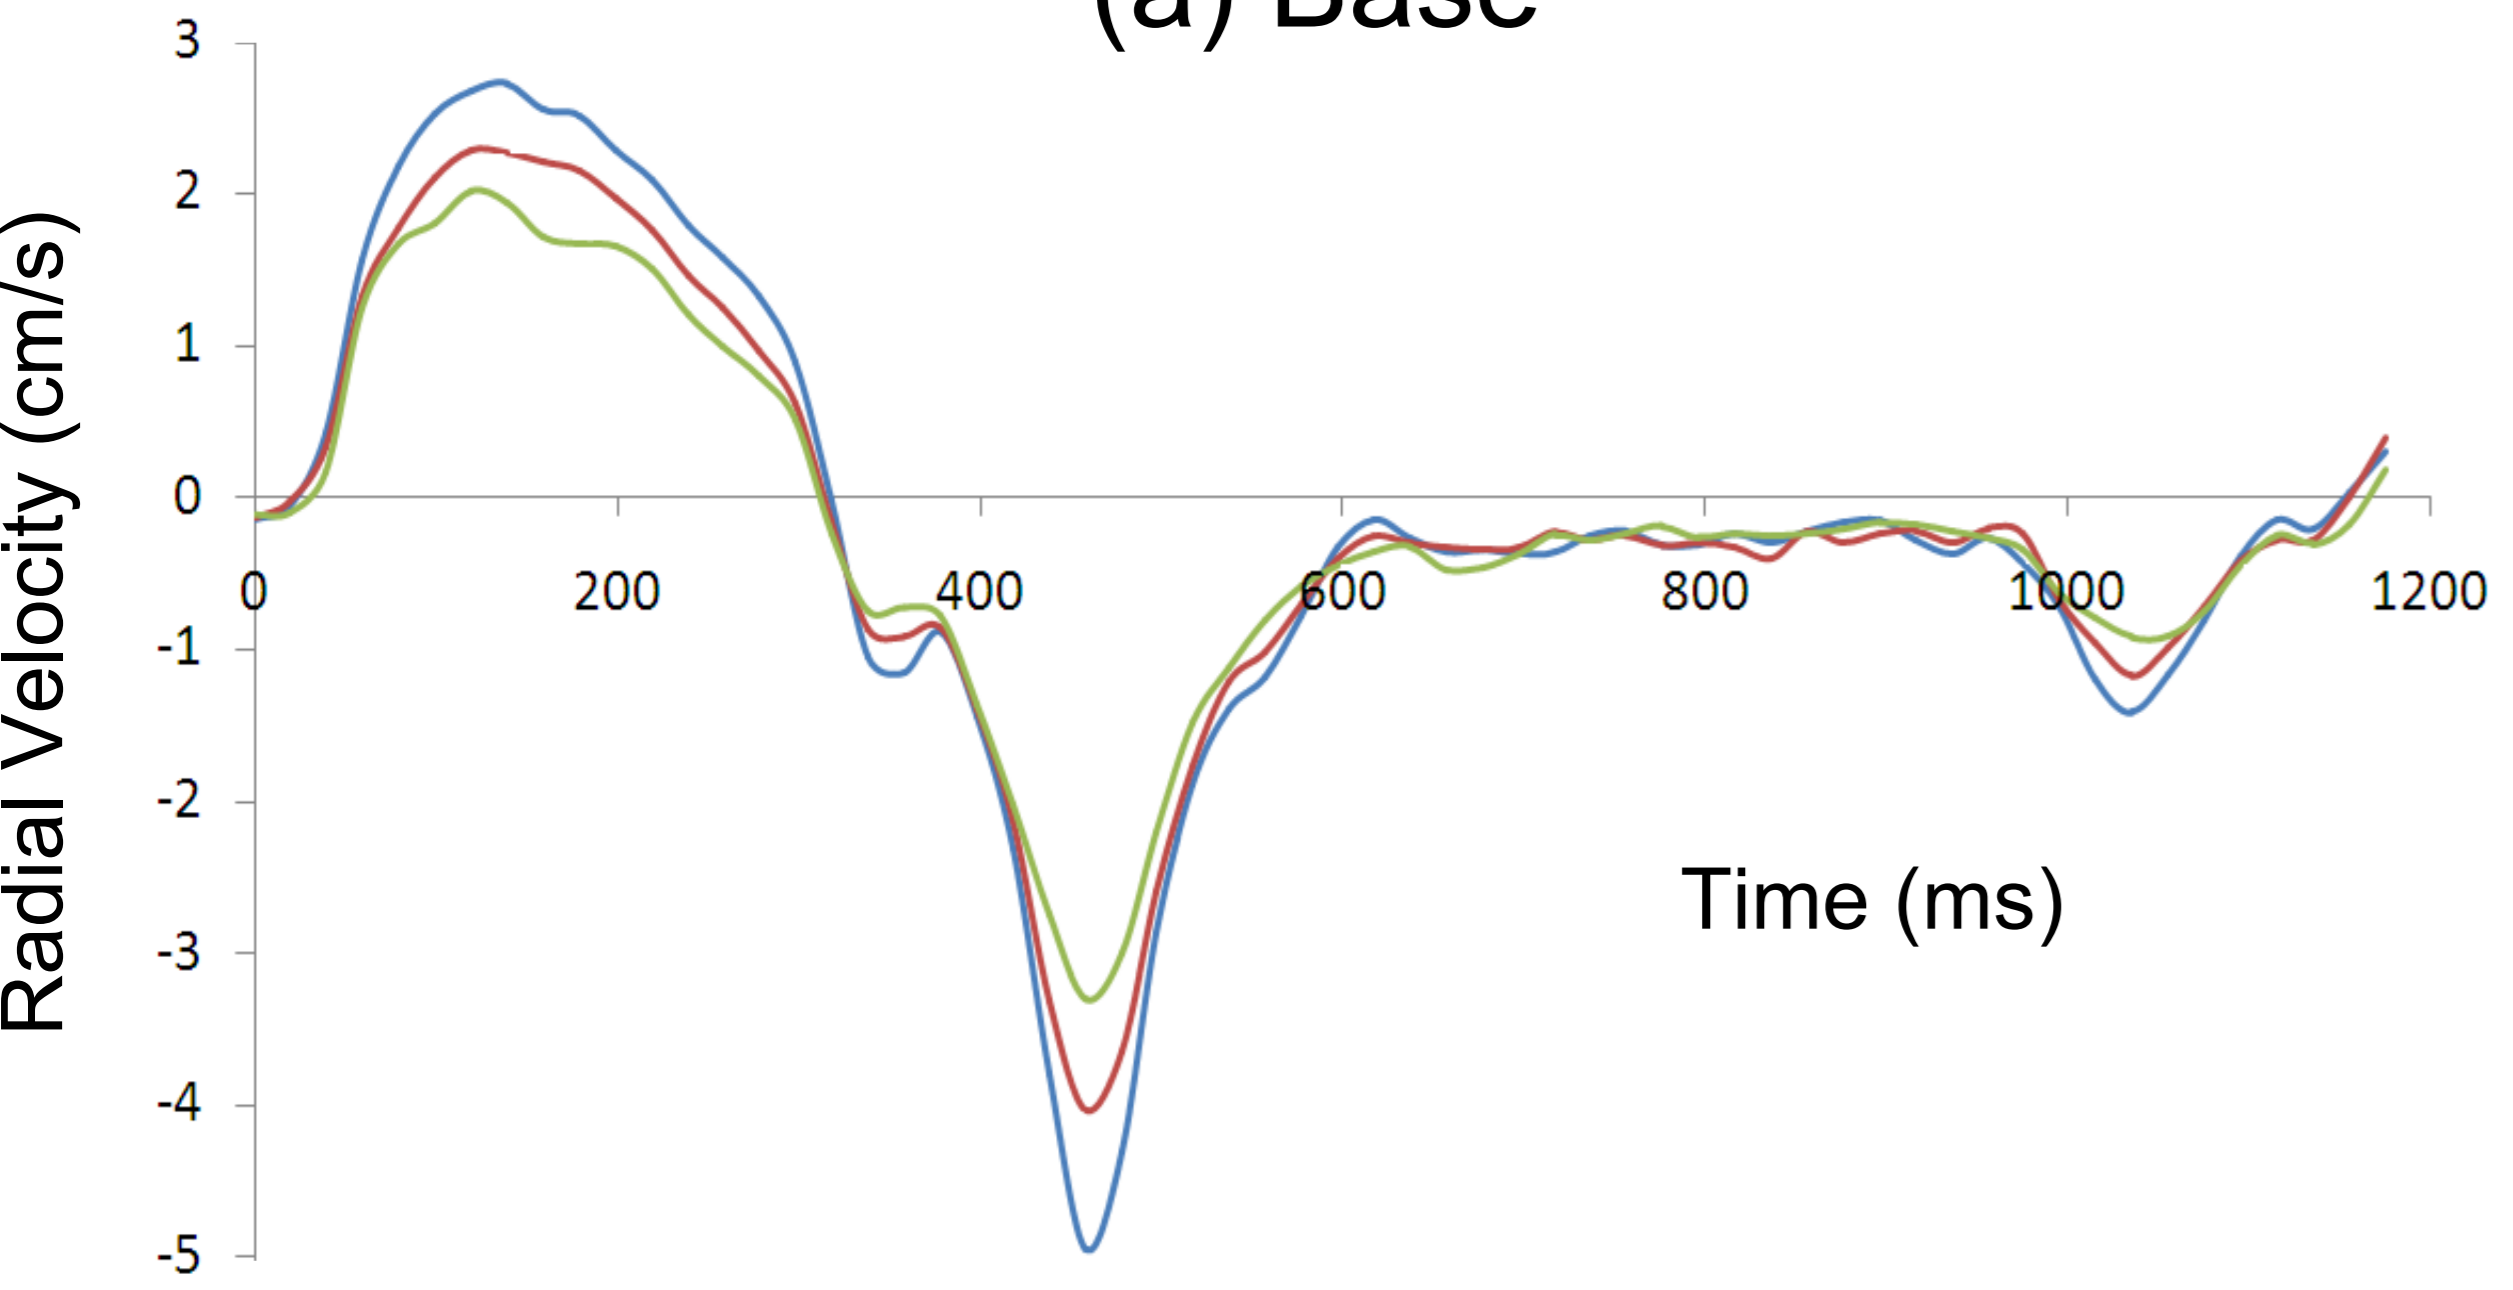

(b) Mid

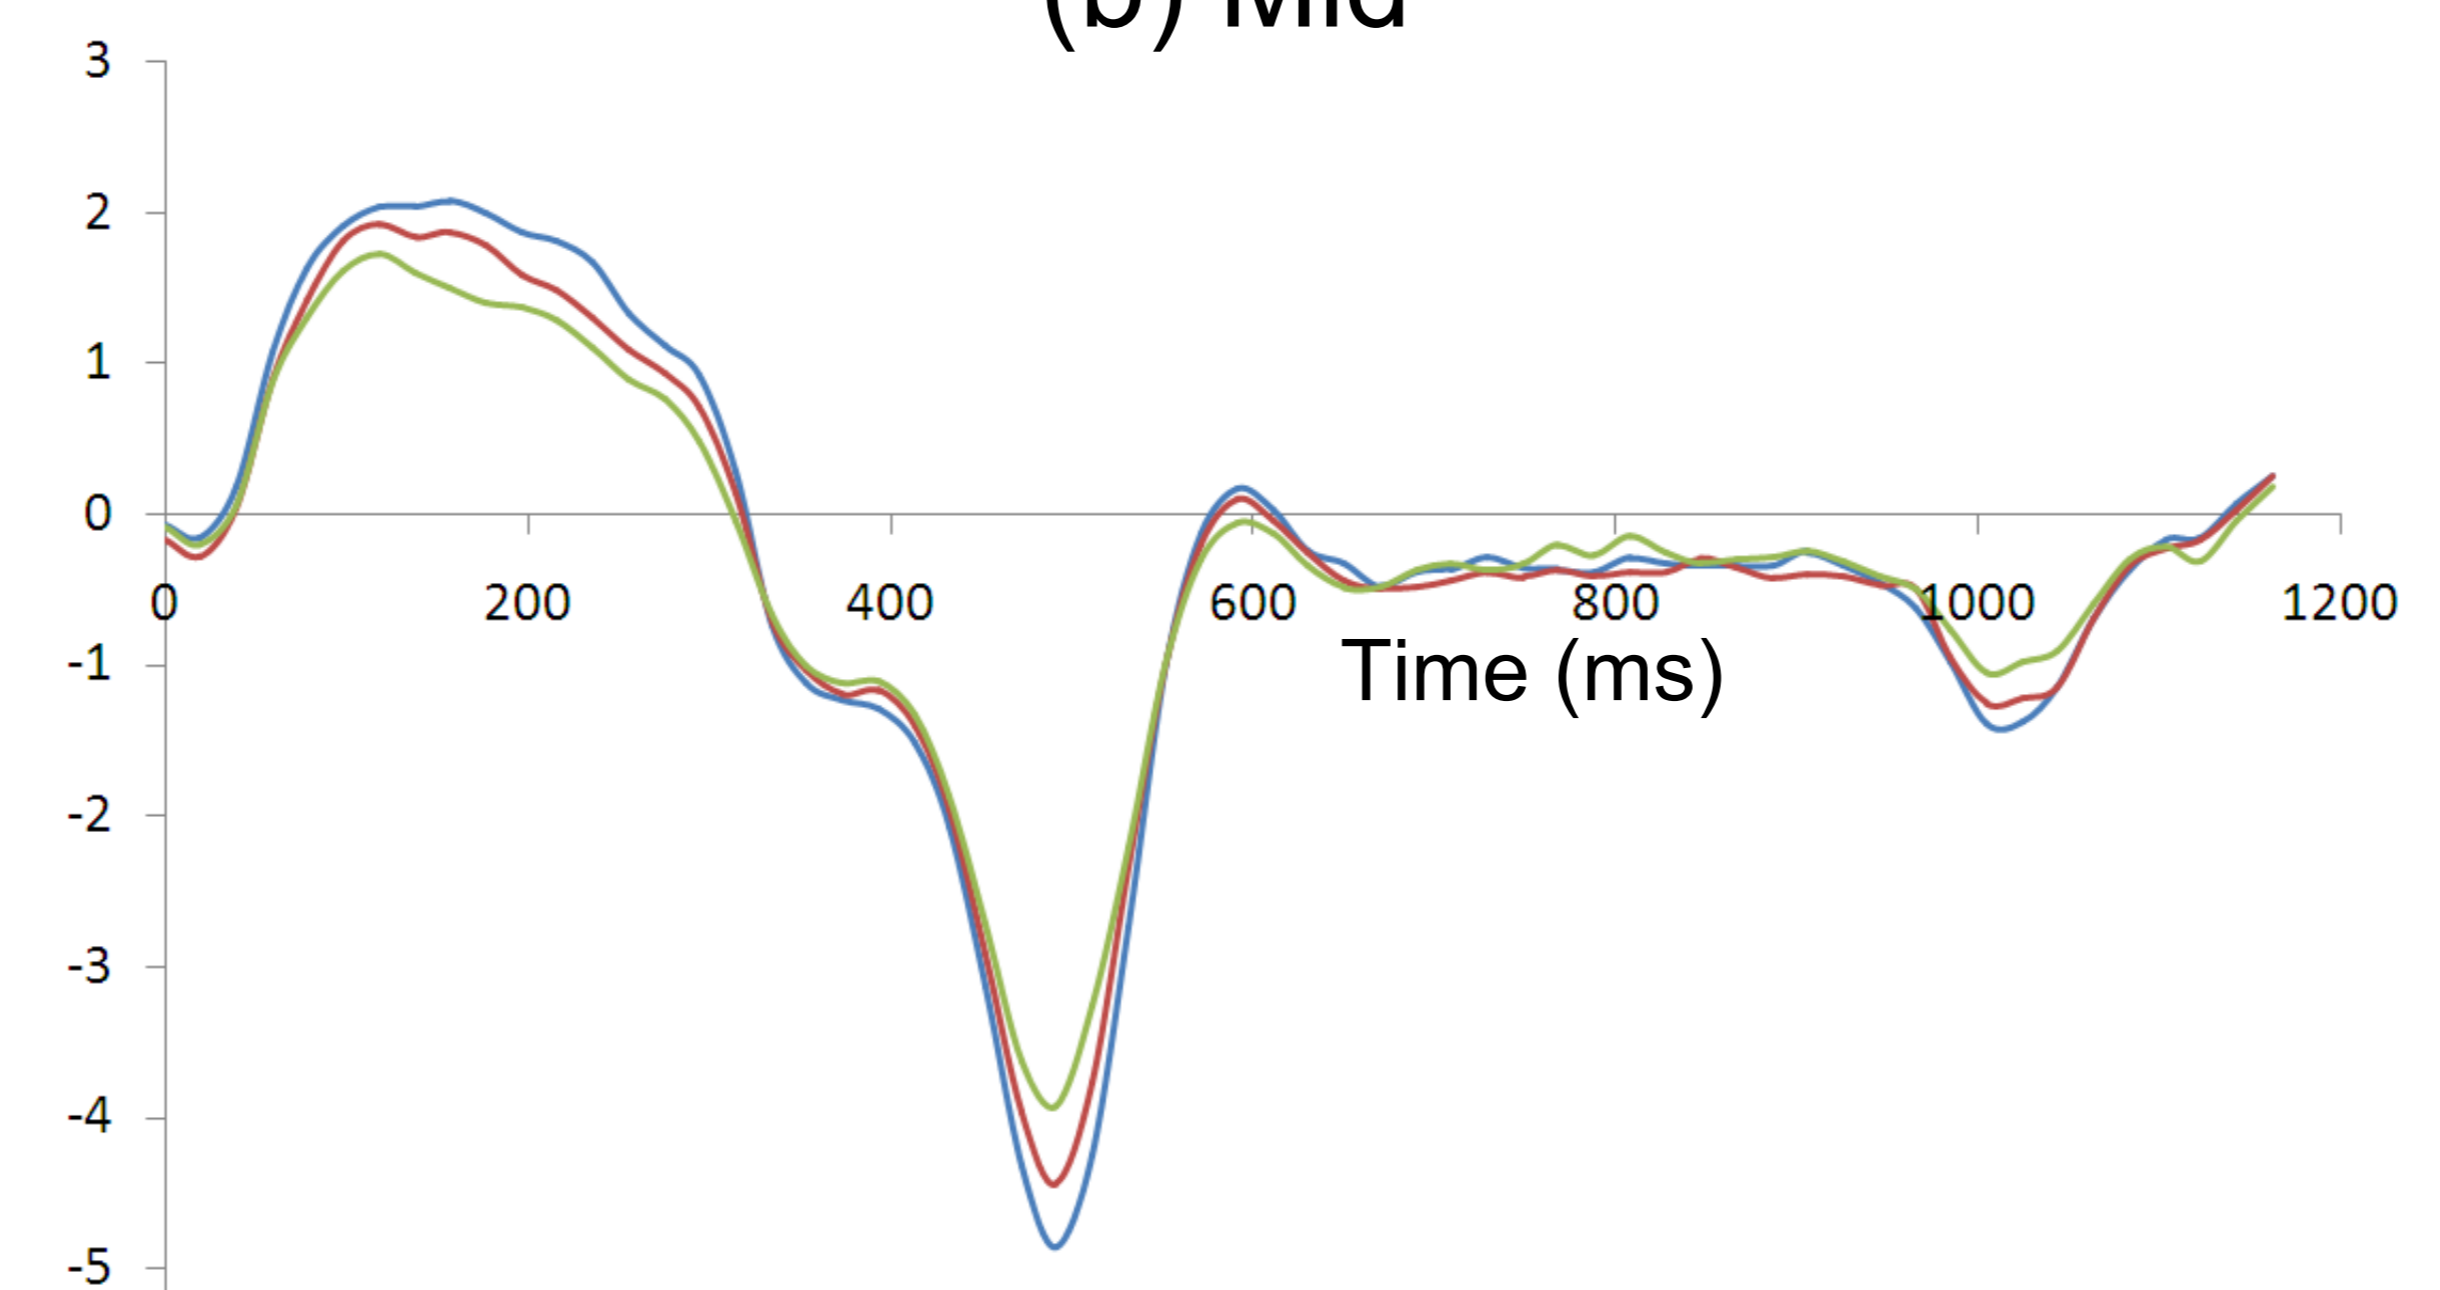

(c) Apex

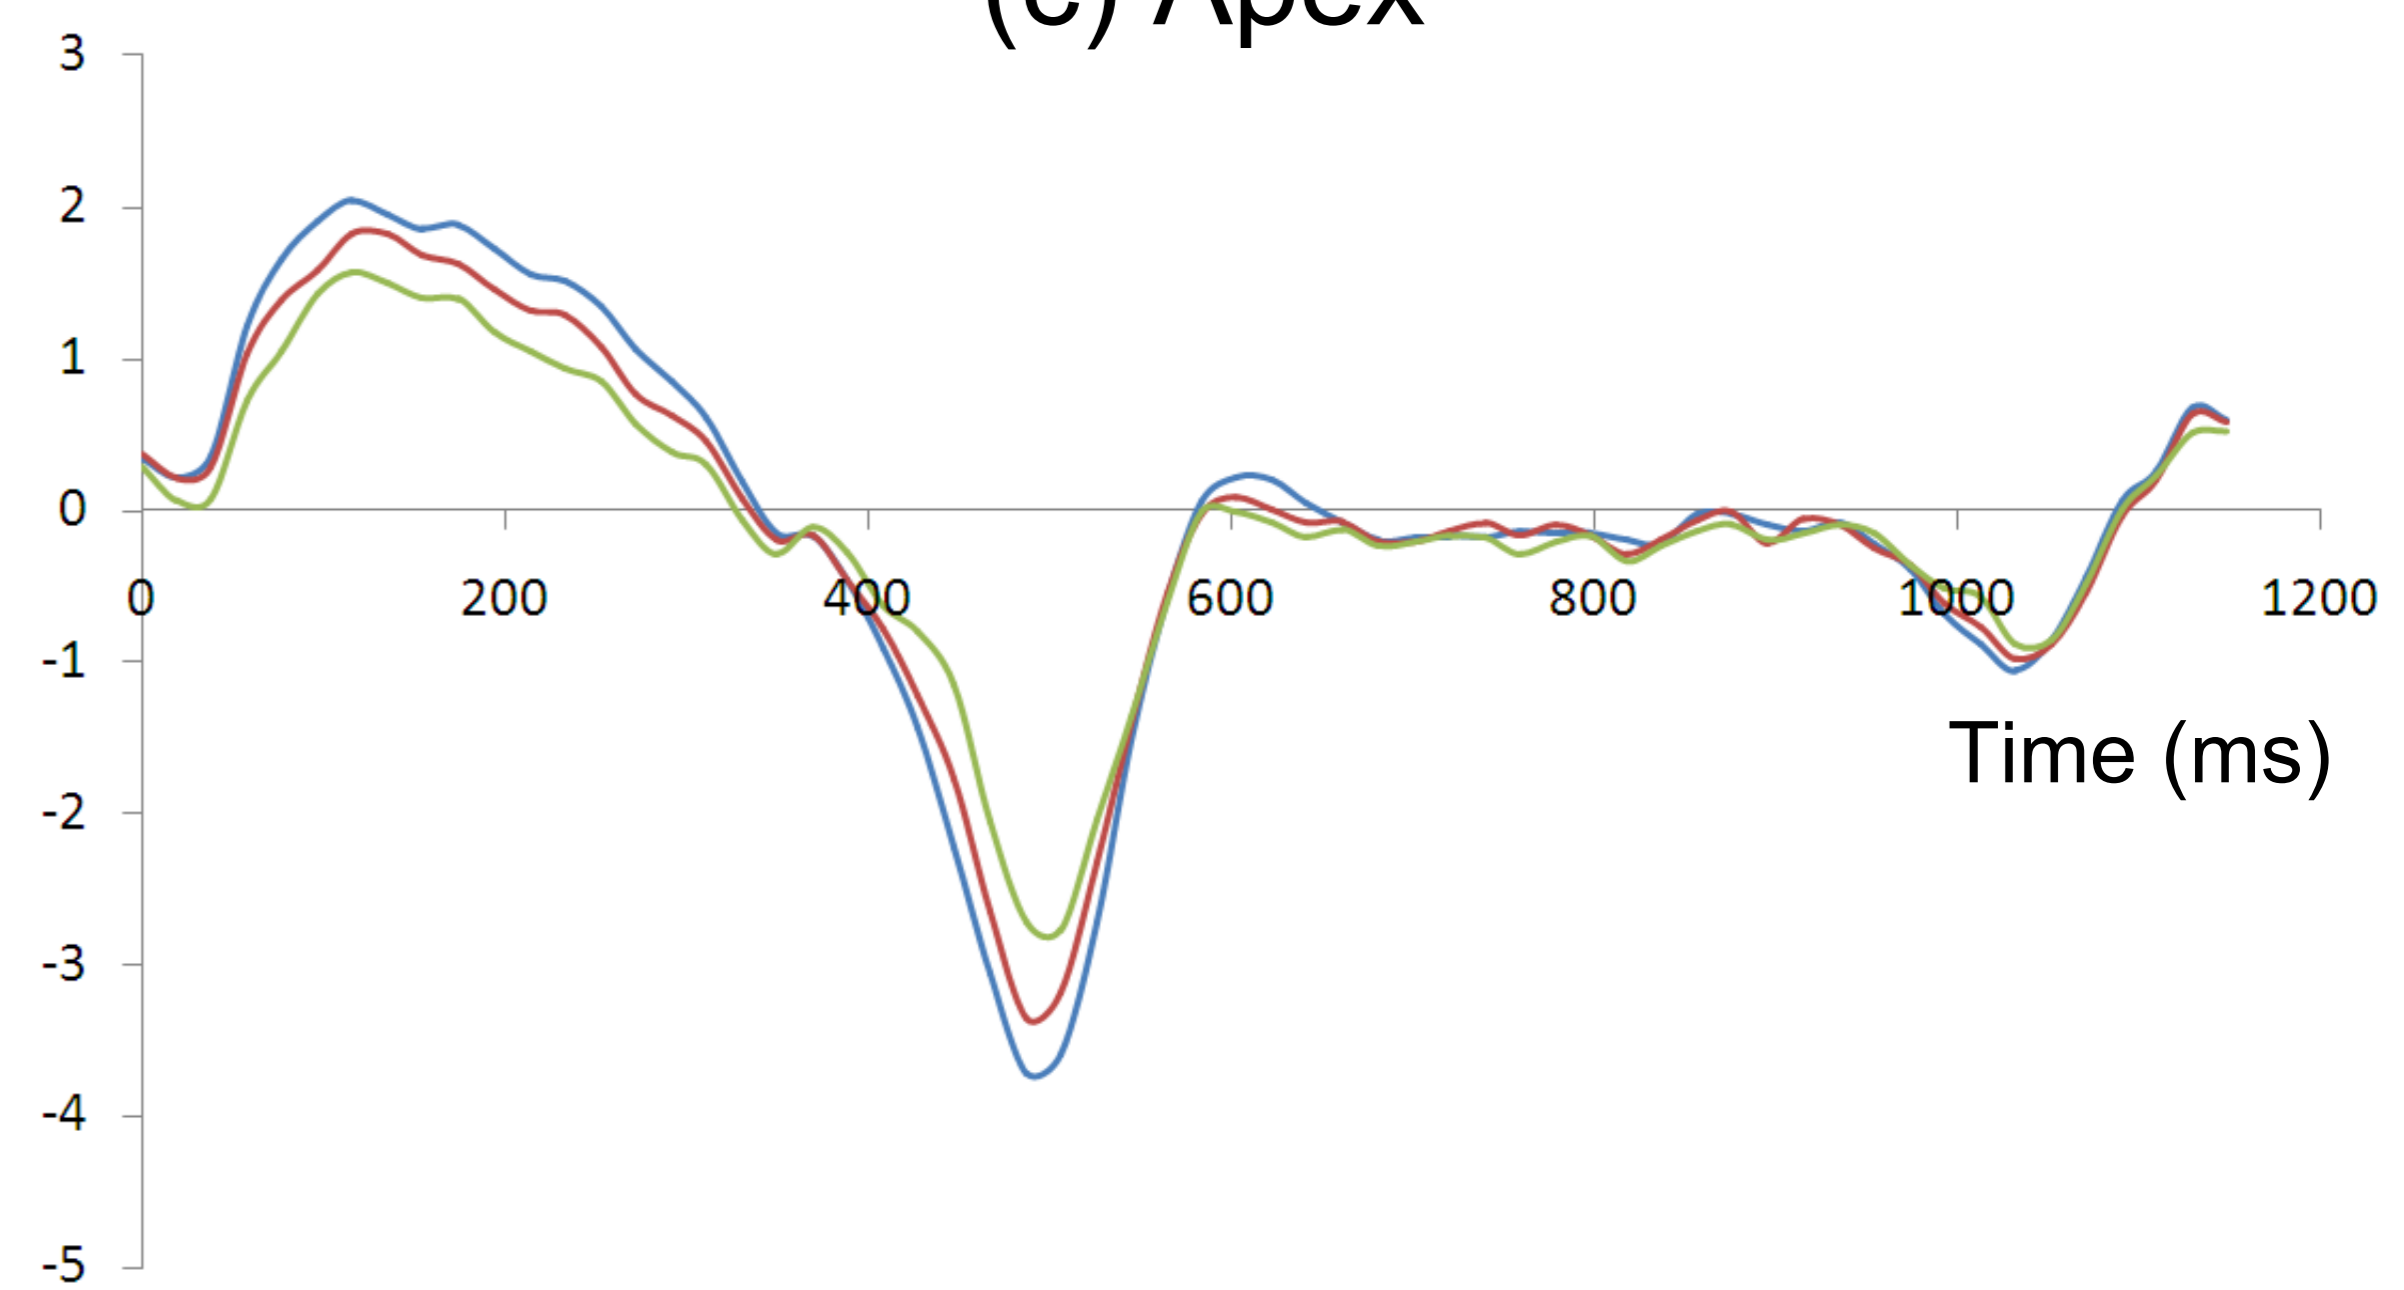

Supplement: MOESM6 [file 9583552]
